# Supplementary material
Source: ML conference proceedings conference paper supplement (https://openreview.net/forum?id=YqHW0o9wXae)
Supplement: supplementary_material [file attachment]

# Assisted Learning for Organizations with Limited Imbalanced Data

This folder contains the main file ([main\\_cc.py](#)), command arguments ([cmd\\_args\\_cc.py](#)), data preprocessing codes ([data\\_sampling\\_cc.py](#)), helper functions ([utils\\_cc.py](#)), example command ([run.sh](#) which will not be used and implemented directly), and a sub-folder [models\\_fed](#). And we put the models in the sub-folder [models\\_fed](#).

## Requirements

- The version of Python should be 3.6 or above (3.6 is preferred);
- The version of PyTorch should be 1.1.0 or above (1.1.0 is preferred);
- The dataset CIFAR-10 can be automatically downloaded when run the codes.

## Commands for Running Experiments

As shown in the [cmd\\_args\\_cc.py](#), the AssistSGD, standard SGD, Learner-SGD and FedAvg algorithms are implemented under the following default hyperparameters:

training mode: `--command='train'` ;  
dataset with choice CIFAR-10 (`'cifar10'`): `--data='cifar10'` ;  
Learner batch size: `--U-batch-size=256`;  
Provider batch size: `--A-batch-size=256`;  
assistance rounds: `--epochs=10` ;  
learning rate: `--learning-rate=0.01` (default but can be changed);  
models with choices AlexNet: `--arch='alexnet'` (default but can be changed);  
loss measurement: `--loss='cross_entropy'` ;  
training/learning algorithms with choices AssistSGD (`'SAA5GD'`), standard SGD (`'SGD'`), Learner-SGD (`'USGD'`) and FedAvg (`'fedavg'`): `--learn-type='SGD'` (default but can be changed);  
Learner data heterogeneity  $\gamma_L$  between 0.1 and 1.0: `--U-iid-ratio=0.1` (default but can be changed) ;  
Provider data heterogeneity  $\gamma_P$  between 0.1 and 1.0: `--A-iid-ratio=0.1`;  
The number of total local SGD steps: `--local-steps-init=2000`;  
The sampling period for delivering the models between Learner and Provider: `--local-interval=50` (default but can be changed); The total data size of CIFAR-10 training dataset: `--data-init=50000`;  
The parameter  $\rho$ : `--rou=0.1` (default but can be changed);  
The parameter  $\epsilon$  for differential privacy: `--eps=1.0` (default but can be changed);

Hence, the command for an experiment is: `python main_cc.py` followed by some of the hyperparameters above. The specific example command of an experiment is shown in file ([run.sh](#)).
